# Supplementary material for: How to Analyze, Detect and Adjust Variable Seedbed Depth in Site-Specific Sowing Systems: A Case Study
Source: MDPI journal article supplement (doi:10.3390/agronomy12051092), 2022-04-29
Supplement: s1 [file s1]

**Table S1.** Correlation and regression between seedbed depth and other seedbed parameters

| Crop          | Seedbed depth (x) variation | Depended variable, Y          | Correlation coefficient, r | Simplified regression | Tillage/sowing practices                                                                                                                                                                              | Soil texture and group | References |
|---------------|-----------------------------|-------------------------------|----------------------------|-----------------------|-------------------------------------------------------------------------------------------------------------------------------------------------------------------------------------------------------|------------------------|------------|
| Winter wheat  | 38.5–40.5 mm                | Roughness of seedbed top, mm  | -0.982                     | Y=103.917-1.5x        | Tillage: disc harrowing, pre-sowing cultivation with compound cultivator, rolling. Sowing: mechanical drill with disc-form sowing shares.                                                             | Average loam Cambisol  | [39]       |
|               |                             | L1 moisture content, %        | -1.000*                    | Y=56.642-1.05x        |                                                                                                                                                                                                       |                        |            |
|               |                             | L2 moisture content, %        | -0.866                     | Y=20.417-0.1x         |                                                                                                                                                                                                       |                        |            |
|               |                             | L1 soil particles 2-5 mm, %   | -0.999*                    | Y=63.717-1.1x         |                                                                                                                                                                                                       |                        |            |
|               |                             | L1 soil particles > 5 mm, %   | -0.995*                    | Y=171.567-3.0x        |                                                                                                                                                                                                       |                        |            |
|               |                             | L1 sowing evenness, %         | 0.985                      | Y=-22.4+1.0x          |                                                                                                                                                                                                       |                        |            |
| Spring wheat  | 39–43 mm                    | L3 soil particles > 5 mm, %   | 0.922                      | Y=-13.714+1.429x      | Tillage: disc harrowing, pre-sowing cultivation with compound cultivator. Sowing: mechanical drill with disc-form sowing shares.                                                                      | Average loam Cambisol  | [38]       |
|               |                             | Roughness of seedbed down, mm | 0.983*                     | Y=-17.771+0.743x      |                                                                                                                                                                                                       |                        |            |
|               |                             | L3 moisture content, %        | 0.930*                     | Y=-8.730+0.685x       |                                                                                                                                                                                                       |                        |            |
|               |                             | L2 soil particles < 2 mm, %   | 0.717                      | Y=-7,943+0.670x       |                                                                                                                                                                                                       |                        |            |
|               |                             | L3 sowing evenness, %         | 0.743                      | Y=13.086+1.029        |                                                                                                                                                                                                       |                        |            |
| Spring barley | 40.4–45.6 mm                | L2 moisture content, %        | 0.985*                     | Y=10.565+0.176x       | Tillage: ploughing or stubble cultivating with hoe shares, pre-sowing cultivation with compound cultivator. Sowing: mechanical drill with disc-form or implemented with rotary tilling sowing shares. | Average loam Luvisol   | [40]       |
|               |                             | L3 moisture content, %        | 0.911                      | Y=7.767+0.329x        |                                                                                                                                                                                                       |                        |            |
|               |                             | L1 soil particles < 2 mm, %   | -0.937                     | Y=63.869-1.061x       |                                                                                                                                                                                                       |                        |            |
|               |                             | L2 soil particles < 2 mm, %   | -0.893                     | Y=54.918-0.741x       |                                                                                                                                                                                                       |                        |            |
|               |                             | L2 soil particles > 5 mm, %   | 0.833                      | Y=6.677+0.784x        |                                                                                                                                                                                                       |                        |            |
|               |                             | L3 soil particles 2-5 mm, %   | -0.968*                    | Y=66.648-0.652x       |                                                                                                                                                                                                       |                        |            |
|               |                             | L3 soil particles > 5 mm, %   | 0.899                      | Y=-7.712+1.156x       |                                                                                                                                                                                                       |                        |            |
|               | 15.6–57.4 mm                | Roughness of seedbed top, mm  | 0.922                      | Y=-23.02+1.622x       | Tillage: direct drilling, Shallow ploughing (10 cm depth), deep ploughing (20 cm depth).                                                                                                              | Average loam Luvisol   | [43]       |
|               |                             | L1 sowing evenness, %         | -0.999*                    | Y=79.155-1.355x       |                                                                                                                                                                                                       |                        |            |
|               |                             | L3 sowing evenness, %         | 0.914                      | Y=-23.02+1.672x       |                                                                                                                                                                                                       |                        |            |
| Sugar beet    | 14–53 mm                    | L1 soil particles < 2 mm, %   | 0.857                      | Y=-0.531+0.635x       | Intensive tillage: ploughing, pre-sowing cultivation with S-tine cultivator or compound cultivator or rotary tiller.                                                                                  | Silty loam Planosol    | [3]        |
|               |                             | L2 soil particles < 2 mm, %   | 0.844                      | Y=7.769+0.538x;       |                                                                                                                                                                                                       |                        |            |
|               |                             | L3 soil particles < 2 mm, %   | 0.813**                    | Y=5.99+0.549x         |                                                                                                                                                                                                       |                        |            |
|               |                             | L1 moisture content, %        | -0.871**                   | Y=26.527-0.427x       | Reduced tillage: spring stubble cultivation with rotovator or rotary tiller. Sowing: conventional pneumatic machine with cuneiform shares.                                                            |                        |            |
|               |                             | L2 moisture content, %        | -0.764*                    | Y=25.776-0.227x       |                                                                                                                                                                                                       |                        |            |
|               |                             | L3 moisture content, %        | -0.720                     | Y=24.933-0.175x       |                                                                                                                                                                                                       |                        |            |

|                     |              |                               |          |                     |                                                                                                                                                                                                                                                                                   |                                 |            |
|---------------------|--------------|-------------------------------|----------|---------------------|-----------------------------------------------------------------------------------------------------------------------------------------------------------------------------------------------------------------------------------------------------------------------------------|---------------------------------|------------|
|                     | 12.8–45.7 mm | Roughness of seedbed top, mm  | 0.605    | $Y=31.741+0.285x$   | Intensive tillage: ploughing, pre-sowing cultivation, rolling. Reduced tillage: spring stubble cultivation with rotovator or rotary tiller, zero tillage. Sowing: conventional pneumatic sowing with cuneiform shares or direct mechanical sowing with combined disc-shoe shares. | Silty loam Planosol             | [26,44,45] |
|                     |              | Roughness of seedbed down, mm | 0.450    | $Y=5.867+0.106x$    |                                                                                                                                                                                                                                                                                   |                                 |            |
|                     |              | L1 moisture content, %        | -0.871** | $Y=26.527-0.427x$   |                                                                                                                                                                                                                                                                                   |                                 |            |
|                     |              | L2 moisture content, %        | -0.764*  | $Y=25.776-0.227x$   |                                                                                                                                                                                                                                                                                   |                                 |            |
|                     |              | L1 soil particles < 2 mm, %   | 0.539    | $Y=-6.869+0.767x$   |                                                                                                                                                                                                                                                                                   |                                 |            |
|                     |              | L1 soil particles > 5 mm, %   | -0.439   | $Y=79.675-0.773x$   |                                                                                                                                                                                                                                                                                   |                                 |            |
|                     |              | L2 soil particles < 2 mm, %   | 0.703    | $Y=-4.842+0.845x$   |                                                                                                                                                                                                                                                                                   |                                 |            |
|                     |              | L2 soil particles 2-5 mm, %   | 0.618    | $Y=26.277+0.191x$   |                                                                                                                                                                                                                                                                                   |                                 |            |
|                     |              | L2 soil particles > 5 mm, %   | -0.737*  | $Y=78.455-1.037x$   |                                                                                                                                                                                                                                                                                   |                                 |            |
|                     |              | L3 soil particles < 2 mm, %   | 0.601    | $Y=-4.948+0.756x$   |                                                                                                                                                                                                                                                                                   |                                 |            |
|                     |              | L3 soil particles > 5 mm, %   | -0.680   | $Y=80.172-0.991x$   |                                                                                                                                                                                                                                                                                   |                                 |            |
|                     |              | L1sowing evenness, %          | -0.826*  | $Y=81.11-2.098x$    |                                                                                                                                                                                                                                                                                   |                                 |            |
|                     |              | L3 sowing evenness, %         | 0.636    | $Y=-22.714+2.095x$  |                                                                                                                                                                                                                                                                                   |                                 |            |
|                     | 22–55 mm     | Roughness of seedbed top, mm  | 0.524*   | $Y=19.533+0.535x$   | Tillage: ploughing, pre-sowing cultivation with compound cultivator, rolling with spur and Cambridge rollers.                                                                                                                                                                     | Silty loam Planosol             | [46,47]    |
| Maize               | 47–77 mm     | Roughness of seedbed top, mm  | 0.342    | $Y=41.614+0.163x$   | Intensive tillage: ploughing, pre-sowing cultivation with compound cultivator. Reduced tillage: autumn stubble cultivation with disc cultivator. Sowing: conventional pneumatic machine with cuneiform or disc shares.                                                            | Silty loam Planosol and Luvisol | [48]       |
|                     |              | Roughness of seedbed down, mm | 0.331    | $Y=3.33+0.114x$     |                                                                                                                                                                                                                                                                                   |                                 |            |
|                     |              | L2 moisture content, %        | -0.915   | $Y=32.642-0.197x$   |                                                                                                                                                                                                                                                                                   |                                 |            |
|                     |              | L3 moisture content, %        | -0.990** | $Y=32.582-0.182x$   |                                                                                                                                                                                                                                                                                   |                                 |            |
|                     |              | L1 soil particles < 2 mm, %   | 0.796    | $Y=-5.405+0.672x$   |                                                                                                                                                                                                                                                                                   |                                 |            |
|                     |              | L1 soil particles 2-5 mm, %   | -0.442   | $Y=28.62-0.042x$    |                                                                                                                                                                                                                                                                                   |                                 |            |
|                     |              | L1 soil particles > 5 mm, %   | -0.744   | $Y=76.785-0.629x$   |                                                                                                                                                                                                                                                                                   |                                 |            |
|                     |              | L2 soil particles < 2 mm, %   | 0.711    | $Y=1.429+0.471x$    |                                                                                                                                                                                                                                                                                   |                                 |            |
|                     |              | L2 soil particles > 5 mm, %   | -0.590   | $Y=71.166-0.499x$   |                                                                                                                                                                                                                                                                                   |                                 |            |
|                     |              | L3 soil particles > 5 mm, %   | -0.490   | $Y=76.809-0.487x$   |                                                                                                                                                                                                                                                                                   |                                 |            |
|                     |              | L1sowing evenness, %          | -0.728   | $Y=10.147-0.147x$   |                                                                                                                                                                                                                                                                                   |                                 |            |
|                     |              | L2 sowing evenness, %         | -0.737   | $Y=201.454-2.565x$  |                                                                                                                                                                                                                                                                                   |                                 |            |
|                     |              | L3 sowing evenness, %         | 0.758    | $Y=-111.601+2.712x$ |                                                                                                                                                                                                                                                                                   |                                 |            |
| Winter oilseed rape | 24–37 mm     | L2 moisture content, %        | -0.499   | $Y=30.656-0.588x$   | Tillage: ploughing or disc harrowing, pre-sowing cultivation with compound cultivator. Sowing:                                                                                                                                                                                    | Silty loam Luvisol,             | [38,39,49] |
|                     |              | L3 moisture content L3, %     | -0.535   | $Y=30.997-0.547x$   |                                                                                                                                                                                                                                                                                   |                                 |            |
|                     |              | L1 soil particles > 5 mm, %   | 0.870    | $Y=-17.791+1.716x$  |                                                                                                                                                                                                                                                                                   |                                 |            |

|                     |          |                              |          |                  |                                                                                                                                                                    |                       |      |
|---------------------|----------|------------------------------|----------|------------------|--------------------------------------------------------------------------------------------------------------------------------------------------------------------|-----------------------|------|
|                     |          | L2 soil particles 2-5 mm, %  | 0.441    | Y=24.053+0.166x  | mechanical drill with disc-form sowing shares.                                                                                                                     | average loam Cambisol |      |
|                     |          | L3 soil particles < 2 mm, %  | -0.617   | Y=64.999-0.81x   |                                                                                                                                                                    |                       |      |
|                     |          | L3 soil particles 2-5 mm, %  | -0.638   | Y=43.755-0.376x  |                                                                                                                                                                    |                       |      |
|                     |          | L3 soil particles > 5 mm, %  | -0.680   | Y=65.782-1.036x  |                                                                                                                                                                    |                       |      |
|                     |          | L1sowing evenness, %         | 0.624    | Y=10.527+0.583x  |                                                                                                                                                                    |                       |      |
|                     |          | L2 sowing evenness, %        | -0.586   | Y=94.804-1.341x  |                                                                                                                                                                    |                       |      |
| Spring oilseed rape | 28–38 mm | Roughness of seedbed top, mm | -0.950   | Y=49.697-0.36x   | Tillage: ploughing or stubble cultivating with hoe shares, pre-sowing cultivation with compound cultivator. Sowing: mechanical drill with disc-form sowing shares. | Average loam Luvisol  | [40] |
|                     |          | L2 moisture content, %       | -0.970*  | Y=31.148-0.0366x |                                                                                                                                                                    |                       |      |
|                     |          | L3 moisture content, %       | -0.997** | Y=41.188-0.567x  |                                                                                                                                                                    |                       |      |
|                     |          | L1 soil particles 2-5 mm, %  | 0.998**  | Y=9.637+0.789x   |                                                                                                                                                                    |                       |      |
|                     |          | L1 soil particles > 5 mm, %  | -0.989** | Y=80.276-0.756x  |                                                                                                                                                                    |                       |      |
|                     |          | L2 soil particles < 2 mm, %  | 0.992**  | Y=1.49+0.199x    |                                                                                                                                                                    |                       |      |
|                     |          | L2 soil particles 2-5 mm, %  | 0.991**  | Y=27.915+0.427x  |                                                                                                                                                                    |                       |      |
|                     |          | L2 soil particles > 5 mm, %  | -0.994** | Y=70.821-0.632x  |                                                                                                                                                                    |                       |      |
|                     |          | L3 soil particles < 2 mm, %  | 1.000**  | Y=2.888+0.111x   |                                                                                                                                                                    |                       |      |
|                     |          | L3 soil particles 2-5 mm, %  | 0.990**  | Y=23.971+0.369x  |                                                                                                                                                                    |                       |      |
|                     |          | L3 soil particles > 5 mm, %  | -0.934   | Y=68.617-0.385x  |                                                                                                                                                                    |                       |      |
|                     |          | L1sowing evenness, %         | 0.997**  | Y=-9.894+0.348   |                                                                                                                                                                    |                       |      |
|                     |          | L2 sowing evenness, %        | -0.977*  | Y=46.725-0.4x    |                                                                                                                                                                    |                       |      |
|                     |          | L3 sowing evenness, %        | 0.984*   | Y=60.907+0.113x  |                                                                                                                                                                    |                       |      |

**Table S2.** Correlation and regression between seedbed depth and crop germination, development and productivity

| Crop         | Seedbed depth (x) variation | Depended variable, Y                     | Correlation coefficient, r | Simplified regression equation | Tillage/sowing practices                                                                                                                  | Soil texture and group | Reference |
|--------------|-----------------------------|------------------------------------------|----------------------------|--------------------------------|-------------------------------------------------------------------------------------------------------------------------------------------|------------------------|-----------|
| Winter wheat | 38.5–40.5 mm                | Productive stems m <sup>-2</sup>         | 1.000*                     | Y=648.717+2.5x                 | Tillage: disc harrowing, pre-sowing cultivation with compound cultivator, rolling. Sowing: mechanical drill with disc-form sowing shares. | Average loam Cambisol  | [39]      |
|              |                             | Mass of 1000 kernels, g                  | -0.993                     | Y=70.217-0.5x                  |                                                                                                                                           |                        |           |
|              |                             | Yield of grain, t ha <sup>-1</sup>       | 0.883                      | Y=-9.097+0.5x                  |                                                                                                                                           |                        |           |
| Spring wheat | 39–43 mm                    | Seed germination, plants m <sup>-2</sup> | 0.675                      | Y=-26.286+14.571x              | Tillage: disc harrowing, pre-sowing cultivation with compound cultivator. Sowing: mechanical drill with disc-form sowing shares.          | Average loam Cambisol  | [38]      |
|              |                             | Productive stems m <sup>-2</sup>         | 0.653                      | Y=398.629+7.543x               |                                                                                                                                           |                        |           |
|              |                             | Mass of 1000 kernels, g                  | 0.717                      | Y=26.029+0.343x                |                                                                                                                                           |                        |           |
|              |                             | Yield of grain, t ha <sup>-1</sup>       | 0.778                      | Y=3.806+0.069x                 |                                                                                                                                           |                        |           |
|              |                             | Seed germination, plants m <sup>-2</sup> | 0.582                      | Y=333.193+11.863x              |                                                                                                                                           |                        | [40]      |

|               |              |                                     |                 |                        |                                                                                                                                                                                                                                                                        |                                 |            |
|---------------|--------------|-------------------------------------|-----------------|------------------------|------------------------------------------------------------------------------------------------------------------------------------------------------------------------------------------------------------------------------------------------------------------------|---------------------------------|------------|
| Spring barley | 40.4–45.6 mm | Height of plant, cm                 | $r=-0.851$      | $Y=107.986-0.718x$     | Tillage: ploughing or stubble cultivating with hoe shares, pre-sowing cultivation with compound cultivator. Sowing: mechanical drills with disc-form or implemented with rotary tilling sowing shares.                                                                 | Average loam Luvisol            |            |
|               |              | Mass of 1000 grains, g              | $r=-0.946$      | $Y=62.894-0.443x$      |                                                                                                                                                                                                                                                                        |                                 |            |
| Sugar beet    | 0–6 cm       | Seed germination, %                 | $r=-0.649^{**}$ | $Y=109.053-8.097x$     | Pot experiment.                                                                                                                                                                                                                                                        | Silty loam Planosol             | [69]       |
|               |              | Mass of seedling, g                 | $r=-0.961^{**}$ | $Y=0.394-0.041x$       |                                                                                                                                                                                                                                                                        |                                 |            |
|               |              | Height of seedling, cm              | $r=-0.957^{**}$ | $Y=10.475-0.882x$      |                                                                                                                                                                                                                                                                        |                                 |            |
|               | 14–53 mm     | Seed germination, %                 | $r=-0.601^*$    | $Y=102.03-43.70x$      | Intensive tillage: ploughing, pre-sowing cultivation with S-tine cultivator or compound cultivator or rotary tiller. Reduced tillage: spring stubble cultivation with rotovator or rotary tiller. Sowing: conventional pneumatic sowing machine with cuneiform shares. | Silty loam Planosol             | [3]        |
|               | 22–55 mm     | Seed germination, %                 | $r=-0.563$      | $Y=77.4-0.778x$        | Tillage: ploughing, pre-sowing cultivation with compound cultivator, rolling with spur and Cambridge rollers.                                                                                                                                                          | Silty loam Planosol             | [46,47]    |
|               | 2.7–9.3 cm   | Technical length of root-crop, cm   | $r=0.556$       | $Y=15.464+0.684x$      | Tillage: ploughing, pre-sowing cultivation with S-tine cultivator, compound cultivator or rotary tiller. Sowing: conventional pneumatic machine sowing with cuneiform shares.                                                                                          | Silty loam Planosol             | [70,71]    |
|               |              | Diameter of root-crop, cm           | $r=0.622$       | $Y=9.058+0.263x$       |                                                                                                                                                                                                                                                                        |                                 |            |
| Maize         | 47–77 mm     | Seed germination, plants $m^{-2}$   | -0.797          | $Y=22.725-0.192x$      | Intensive tillage: ploughing, pre-sowing cultivation with compound cultivator. Reduced tillage: autumn stubble cultivation with disc cultivator. Sowing: conventional pneumatic machine with cuneiform or disc shares.                                                 | Silty loam Planosol and Luvisol | [48]       |
|               |              | Final crop density, plants $m^{-2}$ | -0.764          | $Y=19.645-0.157x$      |                                                                                                                                                                                                                                                                        |                                 |            |
|               |              | Mass of 1000 kernels, g             | 0.856           | $Y=-45.254+5.387x$     |                                                                                                                                                                                                                                                                        |                                 |            |
|               |              | Yield of grain, t $ha^{-1}$         | 0.919           | $Y=1.628+0.057x$       |                                                                                                                                                                                                                                                                        |                                 |            |
|               | 24–37 mm     | Number of siliques, $m^2$           | -0.323          | $Y=17078.197-125.136x$ | Mouldboard ploughing or disc harrowing, pre-sowing cultivation,                                                                                                                                                                                                        | Silty loam Luvisol,             | [38,39,49] |

|                           |           |                                    |          |                 |                                                                                                                        |                                |      |
|---------------------------|-----------|------------------------------------|----------|-----------------|------------------------------------------------------------------------------------------------------------------------|--------------------------------|------|
| Winter<br>oilseed<br>rape |           | Yield of seeds, t ha <sup>-1</sup> | -0.991** | Y=14.145-0.307x | sowing by mechanical drill with<br>disc-form shares.                                                                   | average<br>loam<br>Cambisol    |      |
| Fibre flax                | 0-60.0 mm | Height, cm                         | -0.726   | Y=89.892-0.851x | Mouldboard ploughing followed by<br>spring disking and harrowing prior<br>to seeding. Data of not rolled<br>treatment. | Loam of<br>Melanic<br>Brunisol | [73] |
|                           |           | Fresh yield, t ha <sup>-1</sup>    | -0.833   | Y=30.608-0.949x |                                                                                                                        |                                |      |
|                           |           | Dry matter content, %              | 0.923*   | Y=33.301+0.961x |                                                                                                                        |                                |      |
