# Supplementary material for: How to Analyze, Detect and Adjust Variable Seedbed Depth in Site-Specific Sowing Systems: A Case Study
Source: MDPI journal article supplement (doi:10.3390/agronomy12051092), 2022-04-29
Supplement: s1 [file s1]

Archive with 1 entries (1 files):
- agronomy-1605243-supplementary.pdf
